# Supplementary material for: Mixing the immiscible: blends of dynamic polymer networks
Source: Royal Society of Chemistry journal article supplement (doi:10.1039/c5ra00628g), 2015-01-01
Supplement: c5ra00628g2.pdf [file c5ra00628g2.pdf]

## Supporting Information

### Mixing the Immiscible: Blends of Dynamic Polymer Networks

Roberto Martin,<sup>a</sup> Alaitz Rekondo,<sup>a</sup> Alaitz Ruiz de Luzuriaga,<sup>a</sup> Antxon Santamaria,<sup>b</sup> and Ibon Odriozola<sup>\*,a</sup>

<sup>a</sup>Materials Division, IK4-CIDETEC Research Center, Paseo Miramón 196, 20009 Donostia-San Sebastián, Spain

<sup>b</sup>Polymer Science & Technology Department and POLYMAT, Faculty of Chemistry, University of Basque Country UPV/EHU, 20018 Donostia-San Sebastián, Spain

#### Table of Contents

|                                                                                                                        |   |
|------------------------------------------------------------------------------------------------------------------------|---|
| <b>Materials</b> .....                                                                                                 | 2 |
| <b>Methods</b> .....                                                                                                   | 2 |
| <b>Synthesis of PUU elastomer</b> .....                                                                                | 2 |
| <b>Synthesis of Si-Putty</b> .....                                                                                     | 2 |
| <b>Figure S1. FTIR spectrum of Si-Putty</b> .....                                                                      | 3 |
| <b>Synthesis of DNBs</b> .....                                                                                         | 3 |
| <b>Figure S2. FTIR spectrum of DNB<sub>75</sub></b> .....                                                              | 4 |
| <b>Figure S3. FTIR spectrum of DNB<sub>50</sub></b> .....                                                              | 4 |
| <b>Figure S4. FTIR spectrum of DNB<sub>25</sub></b> .....                                                              | 5 |
| <b>Rheology of Si-Putty and PUU</b> .....                                                                              | 5 |
| <b>Figure S5. Viscoelastic results at T = 25 °C. Elastic, G', and viscous, G'', modulus for Si-Putty.</b><br>.....     | 5 |
| <b>Figure S6. Storage (G') and loss (G'') modulus (Pa) vs. frequency extrapolated master curve for Si-Putty.</b> ..... | 6 |
| <b>Figure S7. Viscoelastic results at T = 25 °C. Elastic, G', and viscous, G'', modulus for PUU.</b><br>.....          | 6 |

## Materials

Hydroxyl-terminated polydimethylsiloxane (PDMS, 750 cst) and boric acid (99.8%) were purchased from Sigma-Aldrich and were used as received.

## Methods

Fourier transform infrared (FTIR) spectra were registered in a Jasco FT/IR 4100 spectrophotometer, using a Gladi ATR accessory and collecting 32 scans at a resolution of 4 cm<sup>-1</sup>.

Rheological testing was carried out in a TA instruments AR2000ex rheometer using a 25 mm plate-plate geometry on 1 mm thick samples.

Mechanical testing was performed using an INSTRON 3365 Long travel Elastomeric Extensometer controlled by Bluehill Lite software. Tensile strength measurements were carried out according to UNE-EN-ISO 527 standard, using dump-bell type test specimens and an elongation rate of 500 mm min<sup>-1</sup>.

Hardness measurements of all the blends and pristine materials were performed using a normalized Shore A durometer.

## Synthesis of PUU elastomer

Molecular characteristics and preparation of the PUU elastomer used in this work have been previously described by our group.<sup>1</sup>

## Synthesis of Si-Putty

**Si-Putty** was prepared in a 50 mL Haake PolyLab internal mixer previously heated at 200 °C. PDMS 750 cst (49.5 g) and boric acid (0.5 g) were added into the internal mixer while the rotors were rotating at 30 rpm. In a few seconds, the boric acid was melted and a putty was formed. The material was mixed for further 45 minutes in order to ensure a good homogenization, and the resulting **Si-Putty** was characterized by FTIR (see Figure S1). Yield: 48.3 g, 96.6%. FTIR (ATR, cm<sup>-1</sup>):  $\nu = 2962$  (stretching CH<sub>3</sub>), 1257 (CH<sub>3</sub> symmetric bending), 1077 and 1007 (stretching Si-O-Si), 786 (Si-CH<sub>3</sub> rocking).

---

<sup>1</sup> a) A. Rekondo, R. Martin, A. Ruiz de Luzuriaga, G. Cabañero, H. J. Grande, I. Odriozola, *Mater. Horiz.*, 2014, **1**, 237-240, b) R. Martin, A. Rekondo, A. Ruiz de Luzuriaga, G. Cabañero, H. J. Grande, I. Odriozola, *J. Mater. Chem. A*, 2014, **2**, 5710-5715.

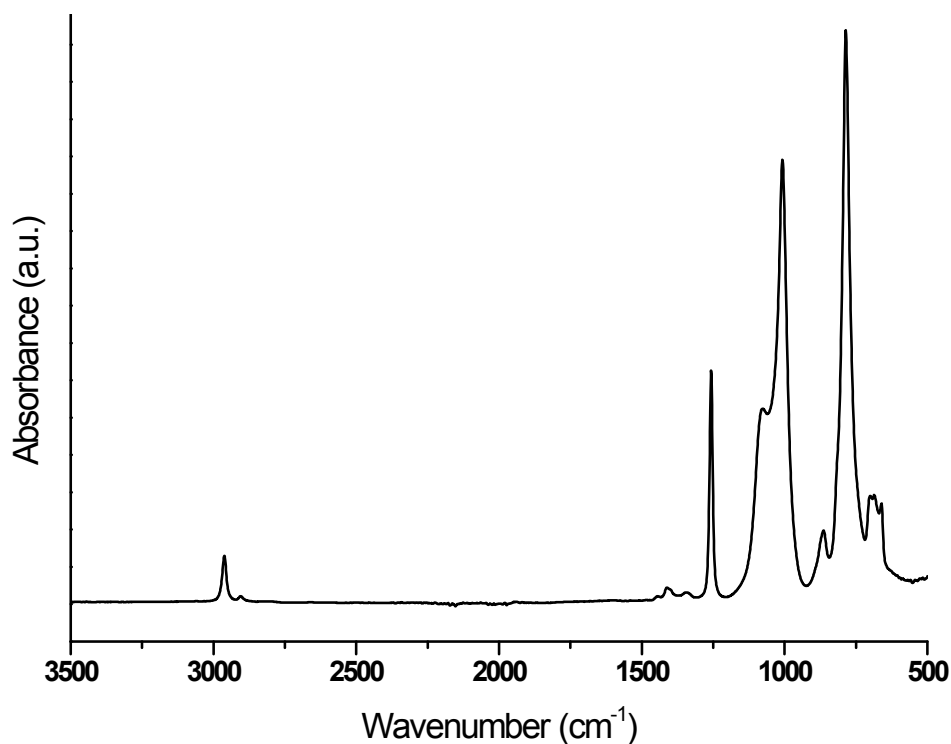

**Figure S1.** FTIR spectrum of **Si-Putty**.

### **Synthesis of DNBs**

The three different DDNs using different **PUU/Si-Putty** ratios (75/25, 50/50 and 25/75 wt%) were prepared in a 50 mL Haake PolyLab internal mixer. For the preparation of 50 g of each blend, **PUU** and **Si-Putty** were fed into the internal mixer at room temperature while the rotors were rotating at 30 rpm. Then the internal mixer was heated to 150 °C and the blends were mixed for 1 hour at 150 °C. The resulting homogeneous materials were placed in a 2 mm thick square mold and hot-pressed at 150 °C for 10 minutes, to obtain the materials in the form of sheets. All the blends were characterized by FTIR (see Figures S2-S4).

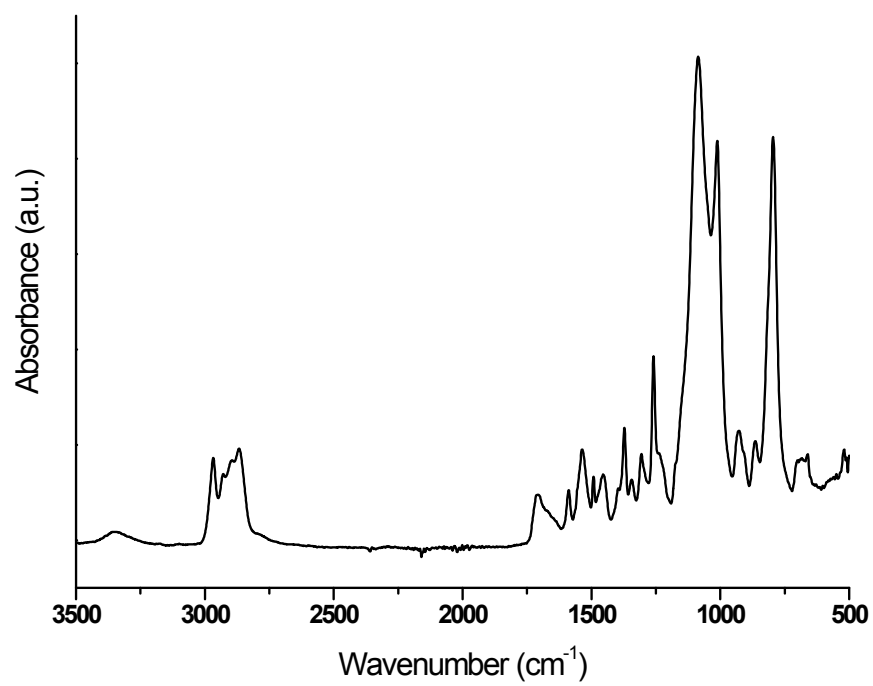

**Figure S2.** FTIR spectrum of DNB<sub>75</sub>.

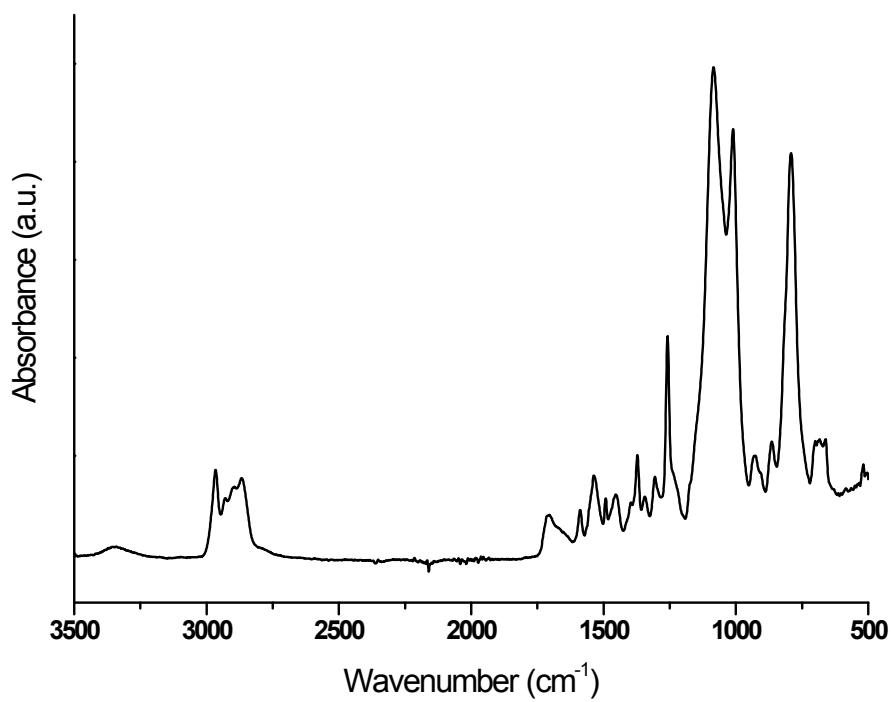

**Figure S3.** FTIR spectrum of DNB<sub>50</sub>.

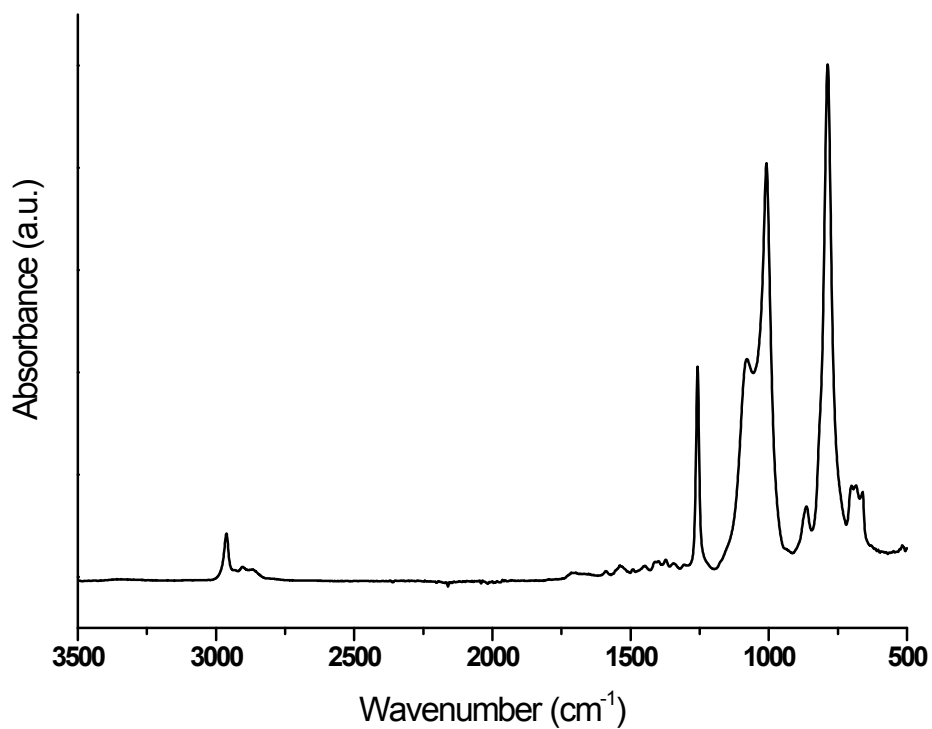

**Figure S4.** FTIR spectrum of DNB<sub>25</sub>.

### Rheology of Si-Putty and PUU

Dynamic viscoelastic results at T = 25 °C. Dependence of both G' and G'' on frequency determined for **Si-Putty**.

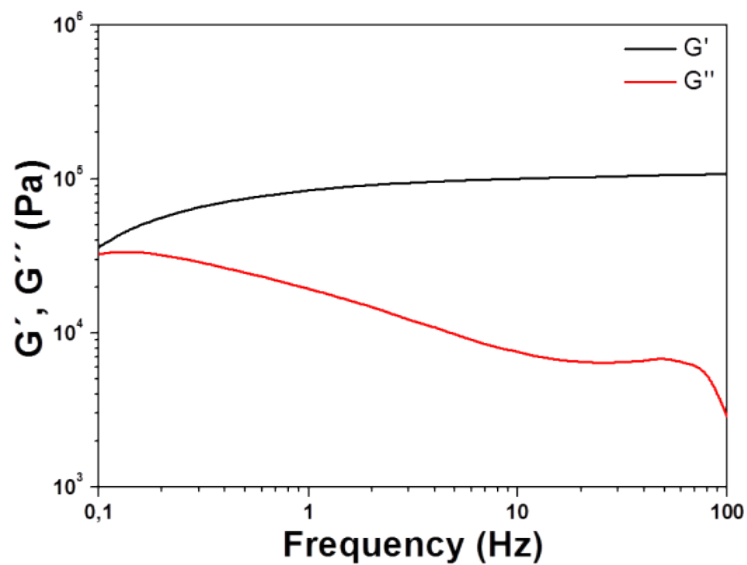

**Figure S5.** Viscoelastic results at T = 25 °C. Elastic, G', and viscous, G'', modulus for **Si-Putty**.

## Master curve of Si-Putty

Master curves of elastic modulus  $G'$  (red) and viscous modulus  $G''$  (black) at  $T_r = 25\text{ }^\circ\text{C}$  for **Si-Putty**, were built from frequency scans at different temperatures in the range  $25\text{--}60\text{ }^\circ\text{C}$ , under linear conditions. Viscoelastic models indicate that a relaxation time can be obtained from the frequency  $\omega_x$  at the crossing point  $G' = G''$ :  $\tau = 1/\omega_x$

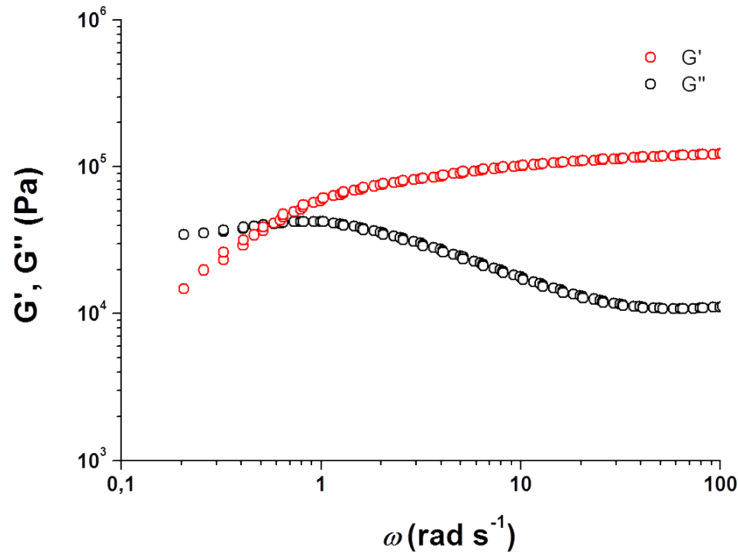

**Figure S6.** Storage ( $G'$ ) and loss ( $G''$ ) modulus (Pa) vs. frequency extrapolated master curve for **Si-Putty**.

## Rheology of PUU

Dynamic viscoelastic results at  $T = 25\text{ }^\circ\text{C}$ . Dependence of both  $G'$  and  $G''$  on frequency determined for **PUU**.

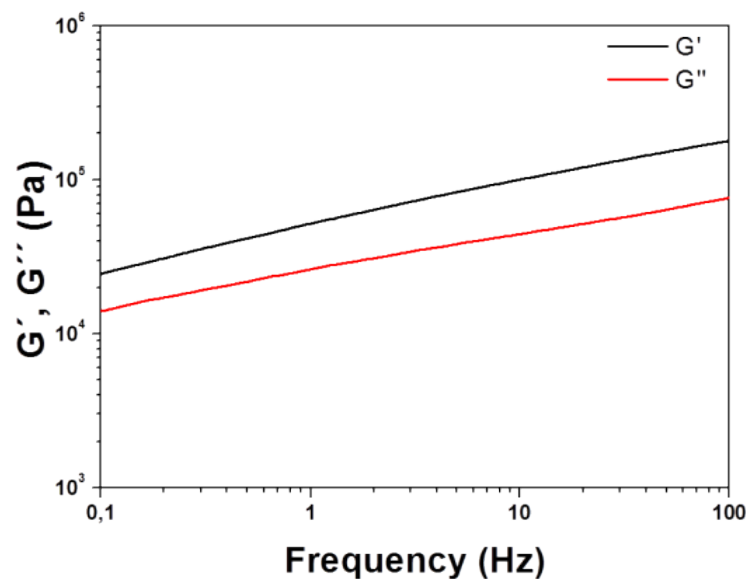

**Figure S7.** Viscoelastic results at  $T = 25\text{ }^\circ\text{C}$ . Elastic,  $G'$ , and viscous,  $G''$ , modulus for **PUU**.
